# Supplementary material for: 2D g-C3N4–MnO2nanocomposite for sensitive and rapid turn-on fluorescence detection of H2O2and glucose
Source: Royal Society of Chemistry journal article supplement (doi:10.1039/c8ay01932k), 2018-01-01
Supplement: c8ay01932k1.pdf [file c8ay01932k1.pdf]

## Electronic Supplementary Information (ESI)

### **2D g-C<sub>3</sub>N<sub>4</sub>-MnO<sub>2</sub> Nanocomposite for Sensitive and Rapid Turn-On Fluorescence Detection of H<sub>2</sub>O<sub>2</sub> and Glucose**

Yu-Jie Zhou, Li Li, Yuan-Hui Wan, Ting-Ting Chen\* and Xia Chu\*

Institute of Chemical Biology and Nanomedicine, State Key Laboratory of Chemo/Bio-sensing and Chemometrics, College of Chemistry and Chemical Engineering, Hunan University, Changsha 410082, P. R. China

\*Corresponding authors. E-mail: chenting1104@hnu.edu.cn;  
xiachu@hnu.edu.cn.

Tel: 86-731-88821916; Fax: 86-731-88821916.

#### **Table of Contents:**

**S-3.** Fig. S1 TEM of MnO<sub>2</sub> nanosheets.

**S-4.** Fig. S2 FTIR spectra of g-C<sub>3</sub>N<sub>4</sub> and g-C<sub>3</sub>N<sub>4</sub>-MnO<sub>2</sub>.

**S-5.** Fig. S3 XPS spectra of g-C<sub>3</sub>N<sub>4</sub> and g-C<sub>3</sub>N<sub>4</sub>-MnO<sub>2</sub>.

**S-6.** Fig. S4 UV-vis absorption spectra of KMnO<sub>4</sub> and MnO<sub>2</sub>.

**S-7.** Fig. S5 Fluorescence spectra of g-C<sub>3</sub>N<sub>4</sub> and g-C<sub>3</sub>N<sub>4</sub>-MnO<sub>2</sub>.

**S-8.** Fig. S6 UV-vis absorption spectra of g-C<sub>3</sub>N<sub>4</sub>-MnO<sub>2</sub> and g-C<sub>3</sub>N<sub>4</sub>.

**S-9.** Fig. S7 AFM images of g-C<sub>3</sub>N<sub>4</sub> and g-C<sub>3</sub>N<sub>4</sub>-MnO<sub>2</sub>.

**S-10.** Table S1 An overview on recently reported methods for the detection of glucose.

**S-11.** References.

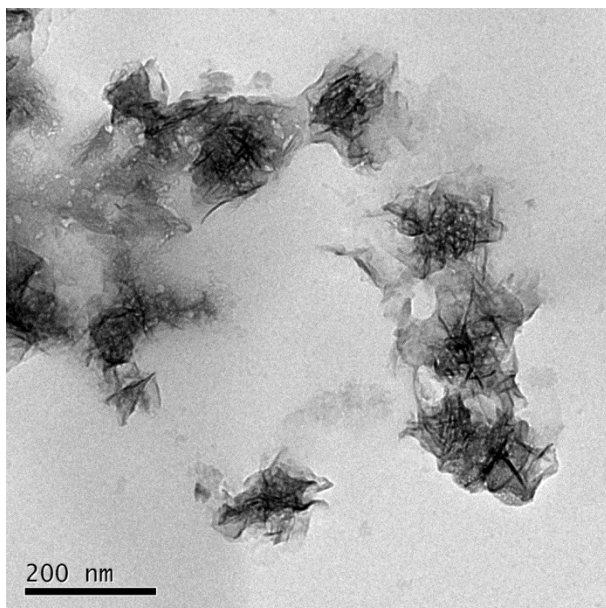

**Fig. S1** TEM of MnO<sub>2</sub> nanosheets. Scale bar: 200 nm.

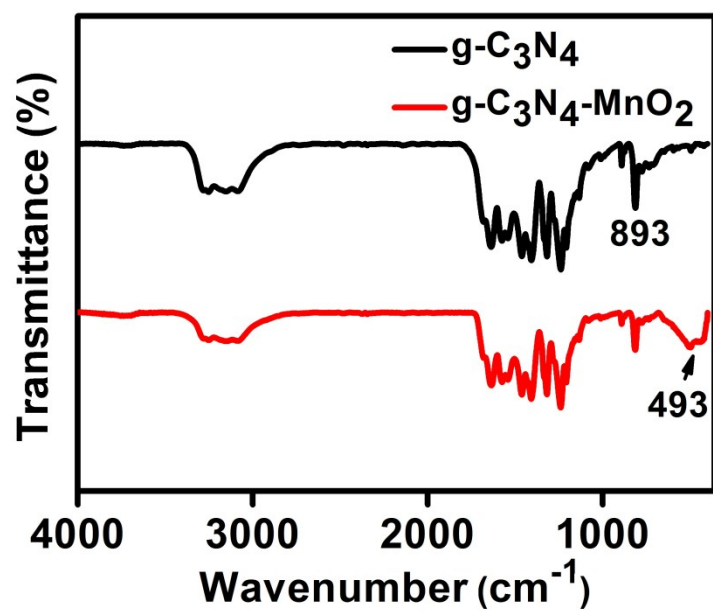

Fig. S2 FTIR spectra of g-C<sub>3</sub>N<sub>4</sub> (top, black) and g-C<sub>3</sub>N<sub>4</sub>-MnO<sub>2</sub> nanocomposite (bottom, red).

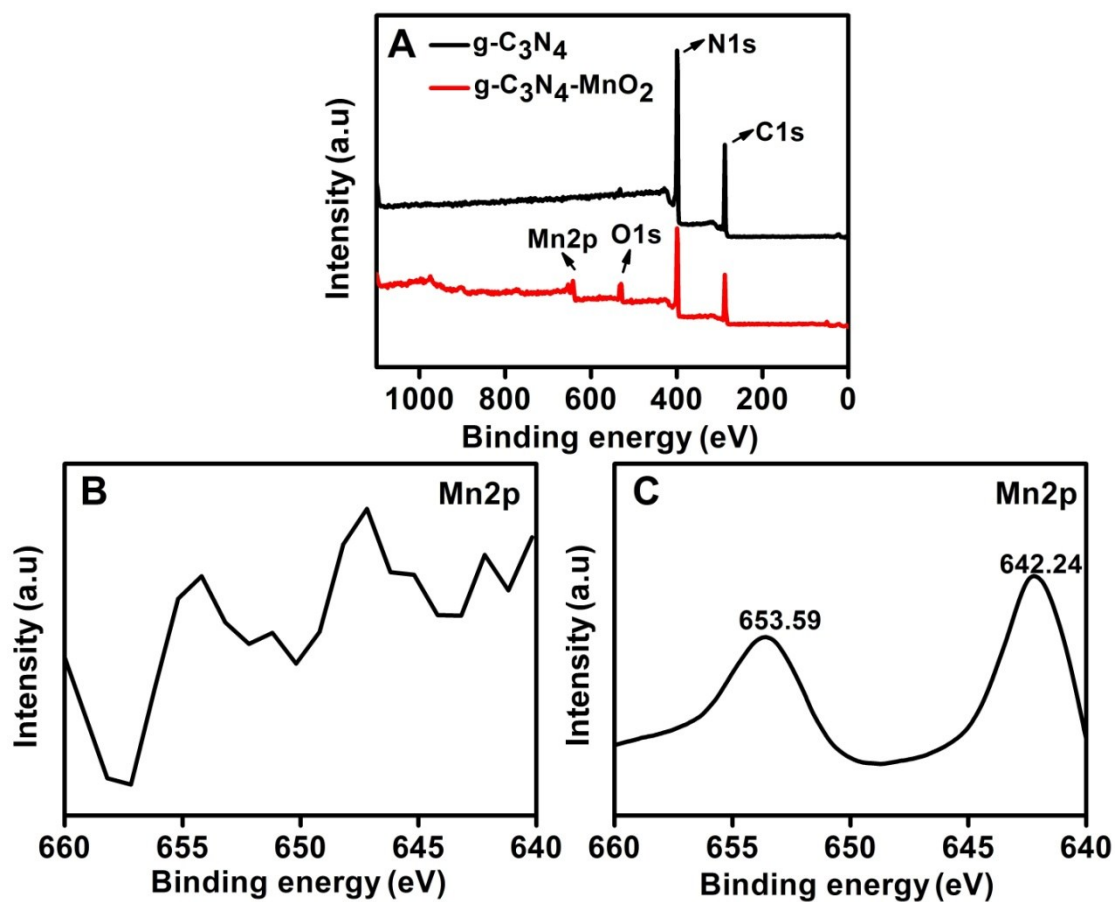

**Fig. S3** (A) XPS spectra of g-C<sub>3</sub>N<sub>4</sub> (top, black) and g-C<sub>3</sub>N<sub>4</sub>-MnO<sub>2</sub> nanocomposite (bottom, red). (B) High resolution Mn (2p) XPS spectra of g-C<sub>3</sub>N<sub>4</sub>. (C) High resolution Mn (2p) XPS spectra of g-C<sub>3</sub>N<sub>4</sub>-MnO<sub>2</sub> nanocomposite.

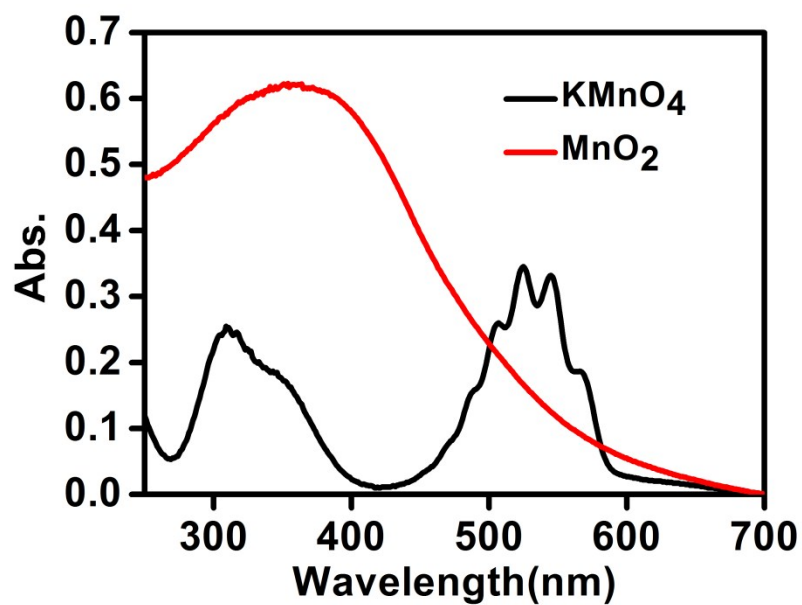

**Fig. S4** UV-vis absorption spectra of aqueous solutions of KMnO<sub>4</sub> (black) and MnO<sub>2</sub> nanosheets (red).

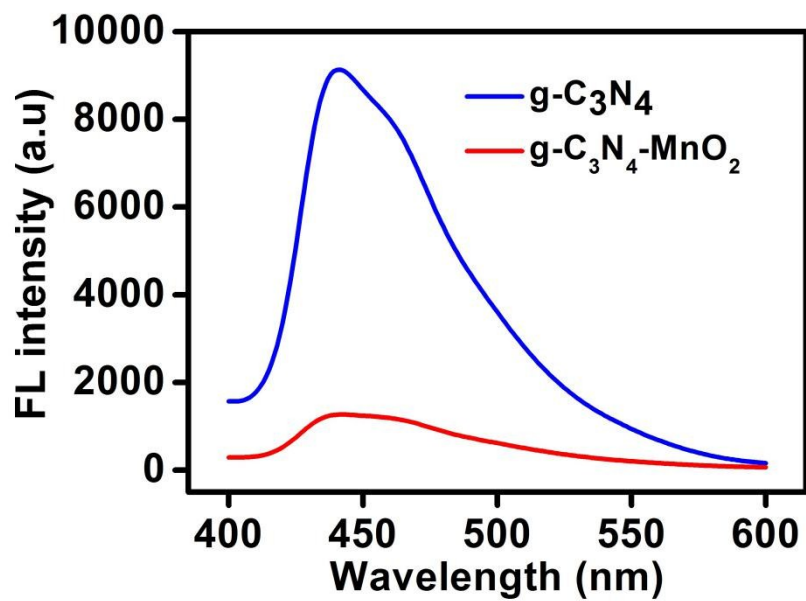

**Fig. S5** Fluorescence spectra of g-C<sub>3</sub>N<sub>4</sub> nanosheets (blue) and g-C<sub>3</sub>N<sub>4</sub>-MnO<sub>2</sub> nanocomposite (red).

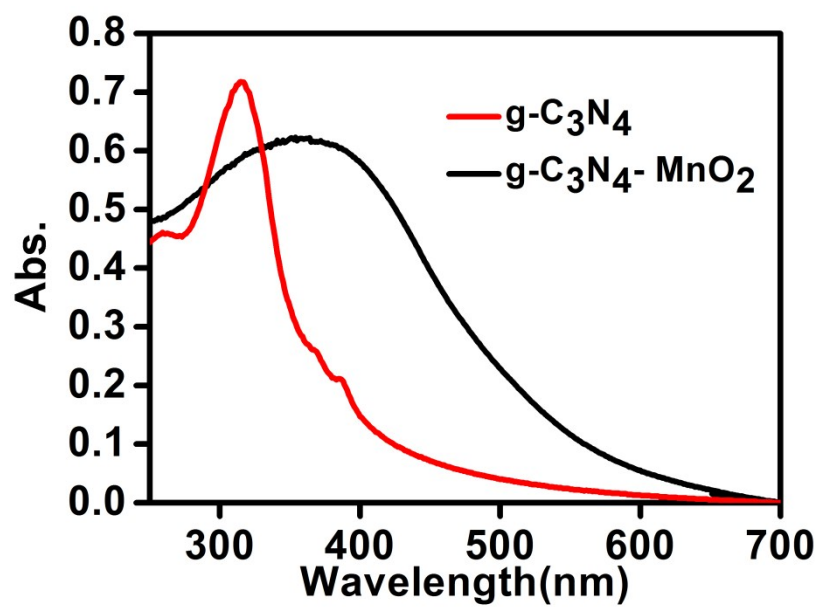

**Fig. S6** UV-vis absorption spectra of aqueous solutions of g-C<sub>3</sub>N<sub>4</sub>-MnO<sub>2</sub> nanocomposite (black) and g-C<sub>3</sub>N<sub>4</sub> nanosheets (red).



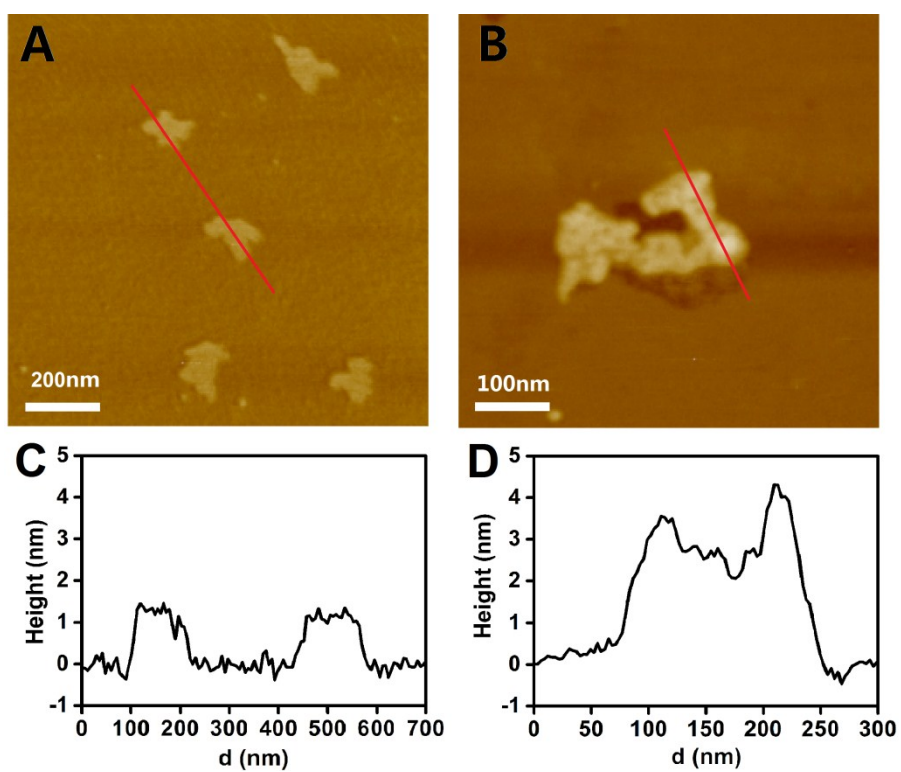

**Fig. S7** AFM images of (A) the g-C<sub>3</sub>N<sub>4</sub> nanosheets and (B) the g-C<sub>3</sub>N<sub>4</sub>-MnO<sub>2</sub> nanocomposite. The corresponding height of (C) the g-C<sub>3</sub>N<sub>4</sub> nanosheets and (D) the g-C<sub>3</sub>N<sub>4</sub>-MnO<sub>2</sub> nanocomposite.

**Table S1** An overview on recently reported methods for the detection of glucose.

| Materials                                                          | Method          | Detection range            | Limit of detection | Reference |
|--------------------------------------------------------------------|-----------------|----------------------------|--------------------|-----------|
| nanoCoPc/Gr                                                        | Electrochemical | 16.7 to 1600 $\mu\text{M}$ | 14.6 $\mu\text{M}$ | S1        |
| Pd <sub>1</sub> Pt <sub>3</sub> -graphene                          | Electrochemical | 1 to 23 $\mu\text{M}$      | 5 $\mu\text{M}$    | S2        |
| DNA/CuAl-LDH<br>nanohybrids                                        | Colorimetry     | 40 to 200 $\mu\text{M}$    | 8 $\mu\text{M}$    | S3        |
| Fe <sub>3</sub> O <sub>4</sub> /C                                  | Colorimetry     | 6 to 100 $\mu\text{M}$     | 2 $\mu\text{M}$    | S4        |
| QD-AuNP<br>/silica/GOx                                             | Fluorometry     | 5 to 200 $\mu\text{M}$     | 1.32 $\mu\text{M}$ | S5        |
| CdTe QDs                                                           | Fluorometry     | 20 to 260 $\mu\text{M}$    | 20 $\mu\text{M}$   | S6        |
| g-C <sub>3</sub> N <sub>4</sub> -MnO <sub>2</sub><br>nanocomposite | Fluorometry     | 10 to 300 $\mu\text{M}$    | 1.5 $\mu\text{M}$  | This work |

## References

- S1. H. Wang, Y. Bu, W. Dai, K. Li, H. Wang and X. Zuo, *Sensors and Actuators B: Chemical*, 2015, **216**, 298-306.
- S2. H. Zhang, X. Xu, Y. Yin, P. Wu and C. Cai, *J. Electroanal. Chem.*, 2013, **690**, 19-24.
- S3. L. Chen, K. Sun, P. Li, X. Fan, J. Sun and S. Ai, *Nanoscale*, 2013, **5**, 10982-10988.
- S4. Q. Li, G. Tang, X. Xiong, Y. Cao, L. Chen, F. Xu and H. Tan, *Sensors and Actuators B: Chemical*, 2015, **215**, 86-92.
- S5. Y. Li, Q. Ma, Z. Liu, X. Wang and X. Su, *Anal. Chim. Acta*, 2014, **840**, 68-74.
- S6. P. Singh, A. A. Prabhune, S. B. Ogale and D. Guin, *J. Mater. Chem. B*, 2013, **1**, 6538-6543.
